# Supplementary material for: Robust Brain-Machine Interface Design Using Optimal Feedback Control Modeling and Adaptive Point Process Filtering
Source: PubMed Central journal article supplement (PMC4818102; doi:10.1371/journal.pcbi.1004730), 2016-04-01
Supplement: pcbi.1004730.s009.pdf [file pcbi.1004730.s009.pdf]

## S2 Table

# Robust Brain-Machine Interface Design Using Optimal Feedback Control Modeling and Adaptive Point Process Filtering

Maryam M. Shanechi<sup>1,2,☉,\*</sup>, Amy L. Orsborn<sup>3,4,☉</sup>, Jose M. Carmena<sup>2-4,\*</sup>

1 Department of Electrical Engineering, Viterbi School of Engineering, University of Southern California, Los Angeles, CA, USA

2 Department of Electrical Engineering and Computer Science, University of California, Berkeley, CA, USA

3 Helen Willis Neuroscience Institute, University of California, Berkeley, CA, USA

4 University of California, Berkeley–University of California, San Francisco Graduate Group in Bioengineering

☉These authors contributed equally to this work.

\* shanechi@usc.edu, carmena@eecs.berkeley.edu

## S2 Table

The Effect of Adaptation Time-Scale on the Speed of Performance Convergence

|                     | Convergence Time (mean $\pm$ s.e.m.) |
|---------------------|--------------------------------------|
| Adaptive OFC-PPF    | 6.5 $\pm$ 0.7 min                    |
| SmoothBatch OFC-PPF | 18.7 $\pm$ 3.2 min                   |
