# Supplementary material for: Robust Brain-Machine Interface Design Using Optimal Feedback Control Modeling and Adaptive Point Process Filtering
Source: PubMed Central journal article supplement (PMC4818102; doi:10.1371/journal.pcbi.1004730), 2016-04-01
Supplement: pcbi.1004730.s010.pdf [file pcbi.1004730.s010.pdf]

# S3 Table

## Robust Brain-Machine Interface Design Using Optimal Feedback Control Modeling and Adaptive Point Process Filtering

Maryam M. Shanechi<sup>1,2,☉,\*</sup>, Amy L. Orsborn<sup>3,4,☉</sup>, Jose M. Carmena<sup>2-4,\*</sup>

1 Department of Electrical Engineering, Viterbi School of Engineering, University of Southern California, Los Angeles, CA, USA

2 Department of Electrical Engineering and Computer Science, University of California, Berkeley, CA, USA

3 Helen Willis Neuroscience Institute, University of California, Berkeley, CA, USA

4 University of California, Berkeley–University of California, San Francisco Graduate Group in Bioengineering

☉These authors contributed equally to this work.

\* shanechi@usc.edu, carmena@eecs.berkeley.edu

### S3 Table

Percent Correct Comparison of Target-Jump vs. Center-Out Trials in the Target-Jump Task

|                    | Percent Correct |
|--------------------|-----------------|
| Target-Jump Trials | 88%             |
| Center-Out Trials  | 92%             |
